# Supplementary material for: Similar freezing spectra of particles on plant canopies as in air at a high-altitude site
Source: Copernicus journal article supplement (doi:10.5194/egusphere-2024-2067), 2024-07-22
Supplement: Supplementary file 1 [file egusphere-2024-2067-supplement.pdf]

## Supplement of

# Similar freezing spectra of particles on plant canopies as in air at a high-altitude site

5 A. Einbock and F. Conen

Correspondence to: A. Einbock

Table S1: Data acquired from trees sampled in Gempen (FS: *F. sylvatica*, JR: *J. regia*, PA: *P. avium*, TP: *T. platyphyllos*): leaf colour as NCS code, differential INP concentration  $k(T)$ , spectral type (mon: monotonous increase, brackets for spectra with insignificant peaks). Duplicate measurements of leaf C and N displayed in separate rows.

| dd/mm/yyyy | no  | tree ID   | NCS code  | $k(T)$ (cm <sup>-2</sup> K <sup>-1</sup> ) |      |      |      |      |       |       | INP <sub>-10</sub> (cm <sup>-2</sup> ) | spectral type | LMA (g m <sup>-2</sup> ) | $\delta^{13}C$ (‰) | N (mg (g dry weight) <sup>-1</sup> ) | C:N atomic ratio |      |
|------------|-----|-----------|-----------|--------------------------------------------|------|------|------|------|-------|-------|----------------------------------------|---------------|--------------------------|--------------------|--------------------------------------|------------------|------|
|            |     |           |           | -2.5                                       | -3.5 | -4.5 | -5.5 | -6.5 | -7.5  | -8.5  |                                        |               |                          |                    |                                      |                  | -9.5 |
| 09/08/2023 | 1   | FS1       | 4050 G40Y | 0.00                                       | 0.00 | 0.00 | 0.27 | 0.54 | 1.22  | 2.13  | 3.51                                   | 7.7           | mon                      | 84.6               | -30.7                                | 29.1             | 19.4 |
|            | 2   | FS2       | 3050 G30Y | 0.00                                       | 0.00 | 0.00 | 0.98 | 2.00 | 6.28  | 10.32 | 16.79                                  | 36.4          | mon                      | 36.5               | -31.9                                | 19.2             | 28.6 |
|            | 3   | JR1       | 3050 G30Y | 0.00                                       | 0.00 | 0.00 | 0.00 | 7.97 | 5.23  | 3.78  | 2.13                                   | 19.1          | >-7.5                    | 31.4               | -33.4                                | 33.1             | 14.1 |
|            | 4   | JR2       | 5030 G30Y | 0.00                                       | 0.00 | 0.00 | 0.04 | 0.29 | 0.21  | 0.55  | 2.39                                   | 3.5           | (>-7.5)                  | 74.9               | -29.8                                | 38.5             | 14.2 |
|            | 5   | PA1       | 3050 G30Y | 0.00                                       | 0.00 | 0.00 | 0.03 | 0.33 | 0.65  | 1.43  | 1.60                                   | 4.0           | mon                      | 75.7               | -29.3                                | 24.8             | 22.4 |
|            | 6   | PA2       | 4050 G40Y | 0.00                                       | 0.00 | 0.00 | 0.02 | 0.09 | 0.30  | 0.64  | 0.71                                   | 1.8           | mon                      | 89.2               | -29.1                                | 19.6             | 28.0 |
|            | 6   | PA2       |           |                                            |      |      |      |      |       |       |                                        |               |                          |                    | -29.3                                | 20.2             | 27.3 |
|            | 7   | TP1       | 4050 G40Y | 0.00                                       | 0.00 | 0.00 | 0.04 | 0.05 | 0.11  | 0.30  | 0.22                                   | 0.7           | (-8.5)                   | 49.4               | -28.5                                | 36.4             | 15.1 |
| 8          | TP2 | 4050 G40Y | 0.00      | 0.00                                       | 0.02 | 0.03 | 0.13 | 0.36 | 0.42  | 0.76  | 1.7                                    | mon           | 49.7                     | -28.5              | 33.9                                 | 16.3             |      |
| 22/08/2023 | 9   | FS1       | 3560 G30Y | 0.00                                       | 0.00 | 0.02 | 0.06 | 2.04 | 3.74  | 4.49  | 5.32                                   | 15.7          | mon                      | 79.0               | -30.7                                | 21.0             | 27.1 |
|            | 10  | FS2       | 3560 G30Y | 0.00                                       | 0.00 | 0.06 | 0.15 | 1.60 | 3.82  | 11.81 | 18.42                                  | 35.9          | mon                      | 30.0               | -33.6                                | 26.8             | 20.8 |
|            | 11  | JR1       | 6030 G30Y | 0.00                                       | 0.00 | 0.00 | 0.09 | 1.43 | 2.37  | 2.33  | 3.05                                   | 9.3           | -7.5                     | 31.7               | -33.8                                | 35.4             | 14.3 |
|            | 12  | JR2       | 5030 G30Y | 0.00                                       | 0.00 | 0.00 | 0.03 | 0.31 | 0.69  | 0.88  | 2.05                                   | 4.0           | mon                      | 47.7               | -32.2                                | 33.3             | 16.8 |
|            | 13  | PA1       | 5040 G40Y | 0.00                                       | 0.00 | 0.00 | 0.41 | 2.49 | 1.29  | 0.00  | 0.51                                   | 4.7           | >-7.5                    | 71.5               | -29.6                                | 22.0             | 24.8 |
|            | 14  | PA2       | 4550 G40Y | 0.00                                       | 0.00 | 0.00 | 0.02 | 0.11 | 0.65  | 1.20  | 0.70                                   | 2.7           | -8.5                     | 73.4               | -29.5                                | 21.8             | 25.9 |
|            | 15  | TP1       | 4550 G40Y | 0.00                                       | 0.00 | 0.00 | 0.00 | 0.08 | 0.40  | 0.68  | 0.31                                   | 1.5           | -8.5                     | 46.9               | -28.1                                | 32.5             | 17.0 |
|            | 16  | TP2       | 4050 G40Y | 0.00                                       | 0.00 | 0.00 | 0.46 | 2.75 | 4.98  | 13.74 | 3.68                                   | 25.6          | -8.5                     | 33.2               | -29.9                                | 27.9             | 18.2 |
| 16         | TP2 |           |           |                                            |      |      |      |      |       |       |                                        |               |                          | -30.2              | 30.4                                 | 16.9             |      |
| 12/09/2023 | 17  | FS1       | 4550 G50Y | 0.00                                       | 0.00 | 0.00 | 0.04 | 0.16 | 1.07  | 1.83  | 4.90                                   | 8.0           | mon                      | 82.2               | -29.7                                | 24.7             | 23.1 |
|            | 18  | FS2       | 4050 G40Y | 0.00                                       | 0.00 | 0.04 | 0.82 | 2.59 | 22.70 | 18.84 | 25.28                                  | 70.3          | -7.5                     | 29.7               | -34.0                                | 23.2             | 23.5 |
|            | 19  | JR1       | 4550 G30Y | 0.02                                       | 0.03 | 0.09 | 0.34 | 1.20 | 1.97  | 4.15  | 7.47                                   | 15.3          | mon                      | 26.8               | -34.2                                | 33.1             | 14.9 |
|            | 19  | JR1       |           |                                            |      |      |      |      |       |       |                                        |               |                          |                    | -34.2                                | 33.3             | 14.7 |
|            | 20  | JR2       | 5540 G30Y | 0.00                                       | 0.00 | 0.10 | 0.02 | 0.21 | 1.33  | 1.69  | 4.80                                   | 8.2           | >-7.5                    | 53.7               | -30.0                                | 27.8             | 18.7 |
|            | 21  | PA1       | 5450 G30Y | 0.00                                       | 0.00 | 0.00 | 0.12 | 0.28 | 0.49  | 3.06  | 6.84                                   | 10.8          | mon                      | 69.7               | -29.8                                | 20.2             | 27.0 |
|            | 22  | PA2       | 4050 G40Y | 0.00                                       | 0.00 | 0.00 | 0.12 | 0.18 | 0.55  | 0.55  | 1.76                                   | 3.1           | (-7.5)                   | 85.1               | -29.3                                | 15.1             | 38.3 |
|            | 23  | TP1       | 5540 G40Y | 0.00                                       | 0.00 | 0.00 | 0.02 | 0.37 | 0.90  | 0.81  | 1.42                                   | 3.5           | (-7.5)                   | 48.0               | -29.2                                | 31.1             | 17.1 |
| 24         | TP2 | 4050 G40Y | 0.00      | 0.00                                       | 0.02 | 0.47 | 2.14 | 7.91 | 2.29  | 9.02  | 21.8                                   | -7.5          | 40.5                     | -30.3              | 28.8                                 | 17.8             |      |

| dd/mm/yyyy | no         | tree ID   | NCS code  | k(T) (cm <sup>2</sup> K <sup>-1</sup> ) |       |       |       |       |       |       |       | INP <sub>10</sub><br>(cm <sup>-2</sup> ) | spectral<br>type | LMA<br>(g m <sup>-2</sup> ) | δ <sup>13</sup> C<br>(‰) | N<br>(mg (g<br>dry<br>weight) <sup>-1</sup> ) | C:N<br>atomic<br>ratio |
|------------|------------|-----------|-----------|-----------------------------------------|-------|-------|-------|-------|-------|-------|-------|------------------------------------------|------------------|-----------------------------|--------------------------|-----------------------------------------------|------------------------|
|            |            |           |           | -2.5                                    | -3.5  | -4.5  | -5.5  | -6.5  | -7.5  | -8.5  | -9.5  |                                          |                  |                             |                          |                                               |                        |
| 26/09/2023 | 25         | FS1       | 6030 G70Y | 0.00                                    | 0.00  | 0.04  | 0.10  | 2.68  | 2.80  | 20.52 | 69.09 | 95.2                                     | mon              | 65.1                        | -30.2                    | 21.0                                          | 26.0                   |
|            | 25         | FS1       |           |                                         |       |       |       |       |       |       |       |                                          |                  |                             | -29.9                    | 20.2                                          | 26.7                   |
|            | 26         | FS2       | 5040 G40Y | 0.00                                    | 0.00  | 0.02  | 0.66  | 4.71  | 7.56  | 32.68 | 61.09 | 106.6                                    | mon              | 40.3                        | -33.8                    | 22.6                                          | 24.1                   |
|            | 27         | JR1       | 5040 G30Y | 0.09                                    | 1.34  | 2.24  | 0.92  | 0.97  | 9.65  | 22.59 | 34.77 | 72.6                                     | >-7.5            | 62.0                        | -31.0                    | 30.0                                          | 18.4                   |
|            | 28         | JR2       | 5040 G30Y | 0.00                                    | 0.00  | 0.02  | 0.71  | 2.61  | 1.88  | 2.26  | 4.89  | 12.4                                     | >-7.5            | 28.6                        | -33.8                    | 31.7                                          | 15.9                   |
|            | 29         | PA1       | 5040 G40Y | 0.00                                    | 0.07  | 0.13  | 0.14  | 0.67  | 2.19  | 2.24  | 3.12  | 8.6                                      | mon              | 66.5                        | -30.4                    | 22.5                                          | 23.8                   |
|            | 30         | PA2       | 0560 Y    | 0.00                                    | 0.00  | 0.02  | 0.04  | 0.26  | 1.96  | 2.66  | 3.46  | 8.4                                      | mon              | 76.3                        | -30.8                    | 10.0                                          | 55.3                   |
|            | 31         | TP1       | 5040 G50Y | 0.00                                    | 0.00  | 0.00  | 0.00  | 0.08  | 0.10  | 0.35  | 0.47  | 1.0                                      | mon              | 54.5                        | -28.3                    | 24.7                                          | 22.7                   |
|            | 32         | TP2       | 5040 G40Y | 0.00                                    | 0.00  | 0.03  | 0.71  | 1.71  | 3.85  | 3.48  | 10.05 | 19.8                                     | (-7.5)           | 40.0                        | -30.1                    | 26.6                                          | 19.6                   |
|            | 03/10/2023 | 33        | FS1       | 6030 G90Y                               | 0.00  | 0.00  | 0.00  | 0.05  | 1.08  | 7.99  | 6.22  | 13.37                                    | 28.7             | -7.5                        | 72.7                     | -29.8                                         | 20.1                   |
| 34         |            | FS2       | 3050 Y20R | 0.00                                    | 0.00  | 0.35  | 5.98  | 6.55  | 9.31  | 13.71 | 36.78 | 72.7                                     | mon              | 24.3                        | -34.7                    | 8.7                                           | 61.5                   |
| 35         |            | JR1       | 5040 G40Y | 0.00                                    | 0.06  | 0.06  | 1.12  | 5.12  | 8.19  | 6.66  | 12.48 | 33.7                                     | -7.5             | 31.7                        | -34.3                    | 30.9                                          | 16.5                   |
| 36         |            | JR2       | 2060 Y10R | 0.02                                    | 0.10  | 0.36  | 0.35  | 0.53  | 1.91  | 8.26  | 39.60 | 51.1                                     | (>-7.5)          | 44.4                        | -31.6                    | 10.0                                          | 53.2                   |
| 37         |            | PA1       | 4050 G40Y | 0.02                                    | 1.03  | 1.32  | 1.41  | 1.82  | 4.10  | 10.33 | 8.49  | 28.5                                     | -8.5             | 80.2                        | -29.9                    | 17.6                                          | 30.8                   |
| 38         |            | PA2       | 1050 Y80R | 0.00                                    | 0.00  | 0.04  | 0.15  | 0.75  | 1.81  | 2.48  | 3.67  | 8.9                                      | mon              | 73.4                        | -28.9                    | 9.7                                           | 57.8                   |
| 39         |            | TP1       | 4040 G50Y | 0.00                                    | 0.00  | 0.00  | 0.14  | 2.70  | 3.00  | 2.06  | 2.68  | 10.6                                     | -7.5             | 52.7                        | -28.9                    | 21.6                                          | 25.3                   |
| 40         |            | TP2       | 2060 G90Y | 0.00                                    | 0.08  | 0.12  | 3.67  | 3.86  | 3.52  | 3.27  | 4.01  | 18.5                                     | (>-7.5)          | 35.1                        | -29.5                    | 12.2                                          | 42.3                   |
| 17/10/2023 | 41         | FS1       | 5040 G50Y | 0.00                                    | 0.00  | 0.02  | 0.02  | 0.23  | 1.28  | 2.85  | 5.64  | 10.0                                     | mon              | 92.1                        | -30.4                    | 15.4                                          | 31.4                   |
|            | 42         | FS2       | 4050 G40Y | 0.00                                    | 0.00  | 0.06  | 3.01  | 6.25  | 10.37 | 11.27 | 17.47 | 48.4                                     | mon              | 31.7                        | -34.0                    | 20.7                                          | 25.9                   |
|            | 43         | JR1       | 4550 G30Y | 0.00                                    | 0.00  | 0.00  | 0.13  | 0.73  | 2.74  | 4.26  | 6.02  | 13.9                                     | mon              | 24.4                        | -34.6                    | 26.1                                          | 18.9                   |
|            | 44         | JR2       | 5020 Y30R | 0.00                                    | 0.07  | 0.13  | 0.10  | 0.33  | 2.97  | 13.65 | 11.02 | 28.3                                     | -8.5             | 53.7                        | -30.9                    | 9.7                                           | 57.2                   |
|            | 45         | PA1       | 4050 G40Y | 0.00                                    | 0.00  | 0.00  | 0.09  | 1.20  | 7.59  | 10.68 | 9.74  | 29.3                                     | -8.5             | 81.9                        | -30.6                    | 19.6                                          | 27.2                   |
|            | 46         | PA2       | 1060 Y10R | 0.00                                    | 0.00  | 0.12  | 0.31  | 0.86  | 3.43  | 5.67  | 4.72  | 15.1                                     | (-8.5)           | 74.5                        | -29.9                    | 9.9                                           | 56.1                   |
|            | 46         | PA2       |           |                                         |       |       |       |       |       |       |       |                                          |                  |                             | -29.3                    | 11.0                                          | 51.4                   |
|            | 47         | TP1       | 4040 Y30R | 0.00                                    | 0.00  | 0.00  | 0.01  | 0.23  | 0.86  | 1.75  | 2.20  | 5.1                                      | mon              | 40.4                        | -28.3                    | 10.8                                          | 49.3                   |
| 48         | TP2        | 2050 Y10R | 0.00      | 0.00                                    | 0.00  | 0.59  | 2.71  | 10.45 | 6.22  | 6.06  | 26.0  | -7.5                                     | 38.9             | -29.6                       | 9.2                      | 56.8                                          |                        |
| 30/10/2023 | 49         | FS1       | 1070 Y10R | 0.00                                    | 0.00  | 0.07  | 0.15  | 0.52  | 3.05  | 6.00  | 36.43 | 46.2                                     | mon              | 85.2                        | -31.5                    | 11.1                                          | 50.9                   |
|            | 50         | FS2       | 4050 Y40R | 0.00                                    | 0.02  | 0.51  | 2.36  | 3.05  | 14.79 | 23.12 | 32.01 | 75.9                                     | mon              | 28.6                        | -34.6                    | 7.1                                           | 74.4                   |
|            | 51         | JR1       | 1060 Y    | 0.00                                    | 0.00  | 0.04  | 0.12  | 0.50  | 1.21  | 2.53  | 5.21  | 9.6                                      | mon              | 20.7                        | -34.4                    | 10.2                                          | 47.2                   |
|            | 52         | JR2       | 5030 Y20R | 0.03                                    | 1.77  | 1.84  | 2.05  | 1.70  | 8.74  | 29.52 | 41.16 | 86.8                                     | (>-7.5)          | 53.4                        | -30.3                    | 9.9                                           | 55.1                   |
|            | 52         | JR2       |           |                                         |       |       |       |       |       |       |       |                                          |                  |                             | -30.0                    | 9.6                                           | 56.8                   |
|            | 53         | PA1       | 0570 Y10R | 0.00                                    | 0.02  | 1.01  | 4.29  | 9.32  | 9.71  | 9.68  | 13.40 | 47.4                                     | (-7.5)           | 78.5                        | -30.6                    | 12.0                                          | 44.7                   |
|            | 54         | PA2       | 1040 Y60R | 0.00                                    | 0.17  | 0.25  | 0.27  | 1.19  | 6.26  | 22.21 | 19.70 | 50.1                                     | -8.5             | 78.0                        | -28.6                    | 9.3                                           | 60.0                   |
|            | 55         | TP1       | 3040 Y30R | 0.00                                    | 0.12  | 0.10  | 0.15  | 0.67  | 1.46  | 3.07  | 1.43  | 7.0                                      | -8.5             | 46.8                        | -29.0                    | 10.8                                          | 49.9                   |
| 56         | TP2        | 2040 Y    | 0.00      | 0.00                                    | 0.30  | 2.88  | 4.94  | 6.00  | 2.98  | 4.81  | 21.9  | -7.5                                     | 36.0             | -30.6                       | 13.5                     | 39.0                                          |                        |
| 15/11/2023 | 57         | FS1       | 6030 Y50R | 0.00                                    | 0.00  | 0.02  | 0.02  | 0.16  | 1.00  | 2.37  | 7.59  | 11.1                                     | mon              | 57.6                        | -31.6                    | 9.5                                           | 59.9                   |
|            | 58         | FS2       | 5040 Y50R | 0.00                                    | 0.02  | 0.33  | 2.67  | 4.58  | 7.73  | 10.80 | 16.22 | 42.3                                     | mon              | 34.6                        | -34.3                    | 7.4                                           | 73.4                   |
|            | 58         | FS2       |           |                                         |       |       |       |       |       |       |       |                                          |                  |                             | -34.0                    | 6.6                                           | 81.6                   |
|            | 59         | JR1       | 2060 Y10R | 0.01                                    | 0.28  | 0.60  | 0.39  | 0.66  | 1.74  | 5.33  | 2.47  | 11.5                                     | >-7.5            | 27.2                        | -34.5                    | 12.5                                          | 39.0                   |
|            | 60         | JR2       | 5030 Y20R | 0.73                                    | 7.46  | 6.47  | 10.87 | 7.15  | 10.53 | 60.51 | 62.49 | 166.2                                    | (>-7.5)          | 50.8                        | -32.1                    | 11.2                                          | 48.7                   |
|            | 61         | PA1       | 1060 Y10R | 0.00                                    | 0.07  | 0.19  | 0.75  | 2.21  | 8.15  | 11.28 | 11.05 | 33.7                                     | -8.5             | 64.7                        | -30.9                    | 9.1                                           | 59.9                   |
|            | 62         | PA2       | 1070 Y10R | 0.00                                    | 0.00  | 0.10  | 0.14  | 0.97  | 3.32  | 4.44  | 7.20  | 16.2                                     | mon              | 88.3                        | -29.4                    | 6.9                                           | 80.2                   |
|            | 63         | TP1       | 2060 G90Y | 13.14                                   | 82.52 | 48.26 | 24.33 | 16.83 | 30.21 | 97.29 | 60.75 | 373.3                                    | >-7.5            | 36.1                        | -28.9                    | 10.6                                          | 49.8                   |
| 64         | TP2        | 3040 G70Y | 0.00      | 0.00                                    | 0.82  | 7.38  | 15.87 | 39.53 | 9.04  | 30.15 | 102.8 | -7.5                                     | 35.5             | -31.6                       | 16.3                     | 32.1                                          |                        |

Table S2: Data acquired from one *F. sylvatica* sampled at about 10 m (bottom), 20 m (middle) and 30 m (top) above ground in Hölstein. leaf colour as NCS code, k(T): differential INP concentration. Duplicate measurements for leaf C and N displayed in separate rows.

| dd/mm/yyyy | level  | compass direction | NCS code  | k(T) (cm <sup>2</sup> K <sup>-1</sup> ) |      |      |       |       |       |       |      | INP <sub>10</sub> (cm <sup>-2</sup> ) | LMA (g m <sup>-2</sup> ) | δ <sup>13</sup> C (‰) | N (mg (g dry weight) <sup>-1</sup> ) | C:N atomic ratio |
|------------|--------|-------------------|-----------|-----------------------------------------|------|------|-------|-------|-------|-------|------|---------------------------------------|--------------------------|-----------------------|--------------------------------------|------------------|
|            |        |                   |           | -2.5                                    | -3.5 | -4.5 | -5.5  | -6.5  | -7.5  | -8.5  | -9.5 |                                       |                          |                       |                                      |                  |
| 05/09/2023 | top    | N                 | 4550 G50Y | 0.00                                    | 0.00 | 0.00 | 0.05  | 0.10  | 0.80  | 0.92  | 1.14 | 3.0                                   | 97.6                     | -27.4                 | 15.5                                 | 37.0             |
|            | top    | S                 | 5540 G40Y | 0.00                                    | 0.00 | 0.00 | 0.03  | 0.08  | 0.36  | 0.47  | 2.25 | 3.2                                   | 99.0                     | -27.6                 | 16.8                                 | 34.0             |
|            | middle | N                 | 5540 G40Y | 0.00                                    | 0.00 | 0.00 | 0.11  | 0.46  | 0.99  | 1.76  | 2.56 | 5.9                                   | 84.7                     | -29.2                 | 18.6                                 | 30.6             |
|            | middle | N                 |           |                                         |      |      |       |       |       |       |      |                                       |                          | -28.8                 | 18.1                                 | 31.4             |
|            | middle | S                 | 5040 G50Y | 0.00                                    | 0.00 | 0.00 | 0.05  | 0.06  | 0.33  | 1.33  | 2.53 | 4.3                                   | 91.5                     | -28.5                 | 20.2                                 | 28.6             |
|            | bottom | SE                | 5040 G40Y | 0.00                                    | 0.00 | 0.24 | 11.68 | 20.47 | 19.55 | 17.58 | 3.56 | 73.1                                  | 73.5                     | -28.7                 | 19.2                                 | 29.8             |
|            | bottom | N                 | 5030 G30Y | 0.00                                    | 0.00 | 0.00 | 0.10  | 0.50  | 0.97  | 2.39  | 3.81 | 7.8                                   | 47.8                     | -30.4                 | 20.5                                 | 27.2             |
| 11/10/2023 | top    | N                 | 1070 Y10R | 0.00                                    | 0.00 | 0.02 | 0.06  | 0.10  | 1.00  | 1.90  | 1.64 | 4.7                                   | 84.5                     | -28.1                 | 9.0                                  | 64.0             |
|            | top    | S                 | 1070 Y10R | 0.00                                    | 0.00 | 0.02 | 0.02  | 0.24  | 1.13  | 1.81  | 3.83 | 7.1                                   | 97.8                     | -28.0                 | 9.9                                  | 58.5             |
|            | middle | N                 | 2070 Y10R | 0.00                                    | 0.00 | 0.00 | 0.02  | 0.18  | 0.99  | 1.91  | 3.64 | 6.7                                   | 82.0                     | -28.9                 | 9.5                                  | 60.3             |
|            | middle | S                 | 1070 Y10R | 0.00                                    | 0.00 | 0.00 | 0.04  | 0.24  | 0.90  | 2.02  | 2.56 | 5.8                                   | 84.0                     | -28.8                 | 9.4                                  | 61.0             |
|            | bottom | N                 | 3050 G80Y | 0.00                                    | 0.00 | 0.00 | 0.10  | 0.34  | 1.40  | 3.79  | 1.57 | 7.2                                   | 79.1                     | -29.4                 | 10.6                                 | 54.9             |
|            | bottom | SE                | 4050 G60Y | 0.00                                    | 0.00 | 0.02 | 0.18  | 1.52  | 4.27  | 4.20  | 5.64 | 15.8                                  | 80.1                     | -28.7                 | 17.4                                 | 32.2             |
|            |        |                   |           |                                         |      |      |       |       |       |       |      |                                       |                          | -28.6                 | 18.1                                 | 32.2             |

15

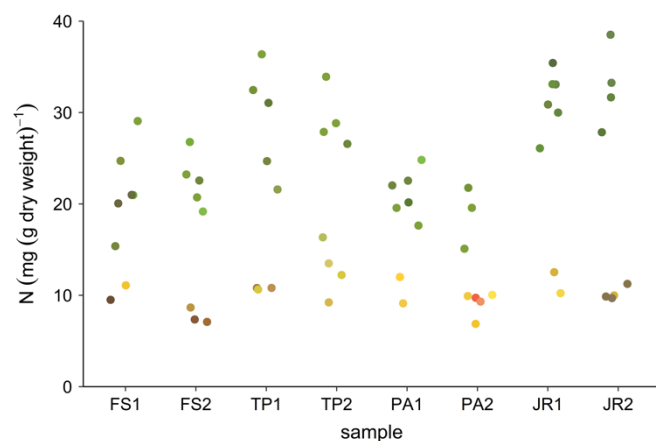

Figure S1: Nitrogen content of foliage from trees sampled in Gempen (FS: *F. sylvatica*, TP: *T. platyphyllos*, PA: *P. avium*, JR: *J. regia*). Colours display leaf colour.

20

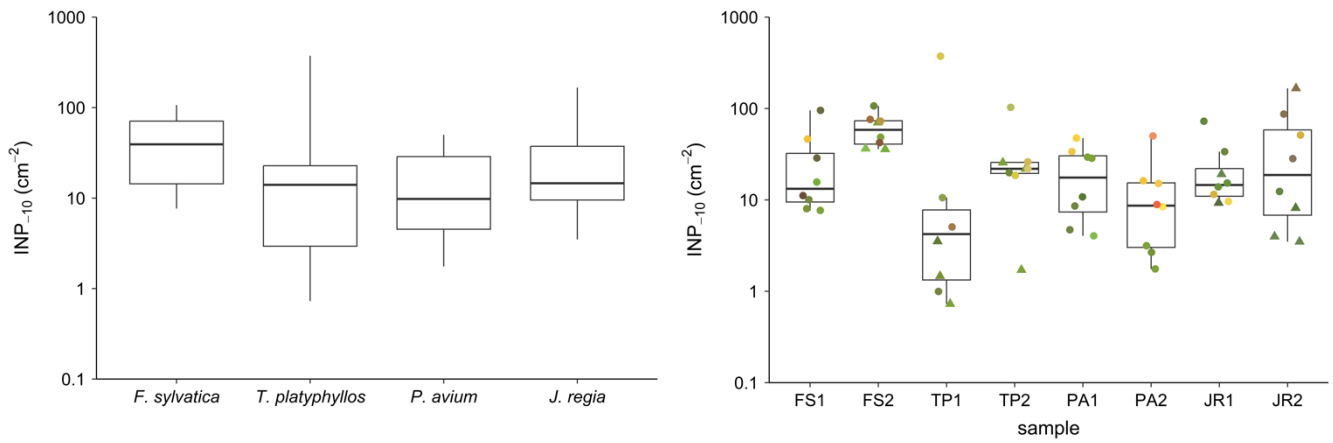

**Figure S2:** Cumulative concentration of INPs active at temperatures  $\geq -10$  °C ( $INP_{-10}$ ) quantified in leaf washing water by species (left) and sampled tree (right) for the Gempen sampling site. Colours represent leaf colour, round symbols samples collected from the same tree.

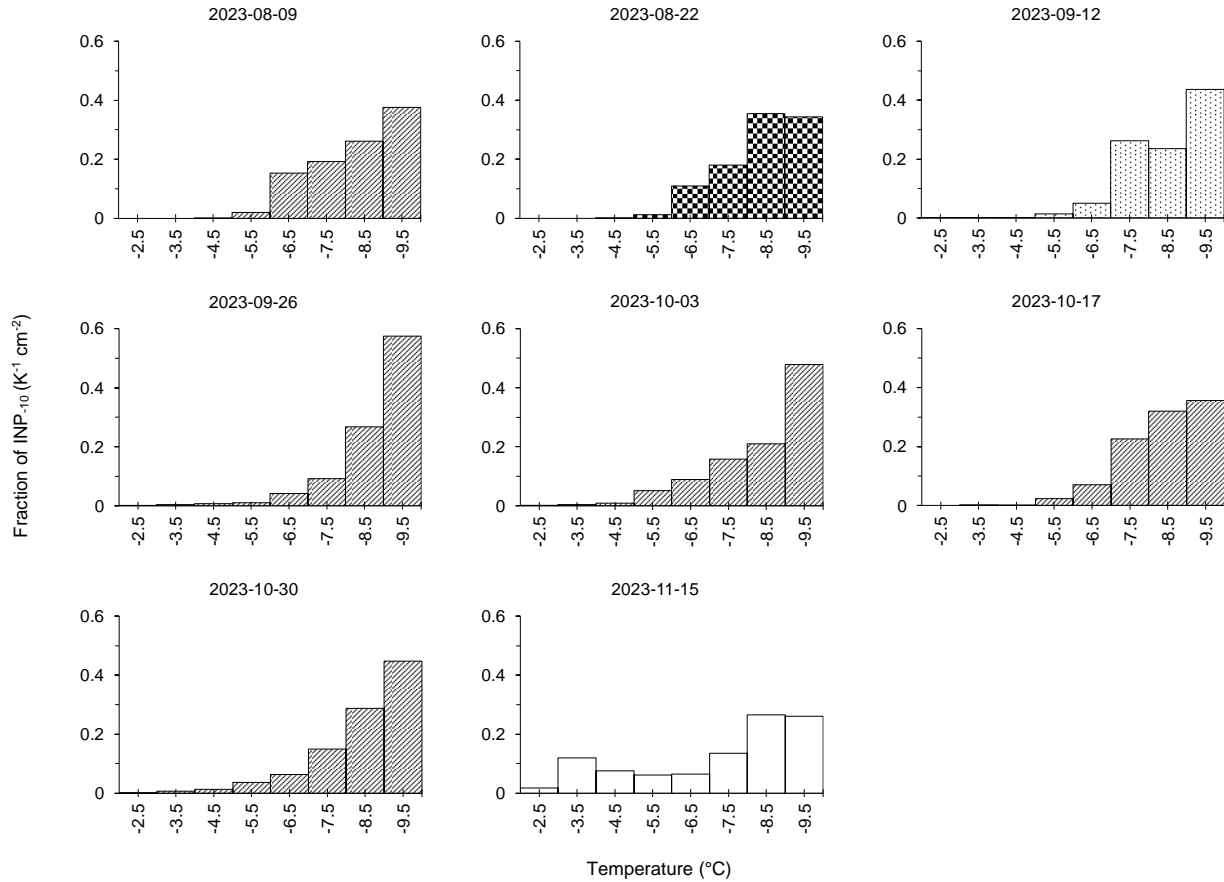

25 **Figure S3:** Mean differential INP concentrations of all trees sampled on a particular day, normalized by total daily cumulative  $INP_{-10}$  concentration.
