# Supplementary material for: Similar freezing spectra of particles on plant canopies as in air at a high-altitude site
Source: Copernicus journal article supplement (doi:10.5194/egusphere-2024-2067), 2024-07-22
Supplement: Supplementary file [file egusphere-2024-2067-AC1-supplement.pdf]

*We are grateful to Referee #1 for their careful and detailed comments and review. Please find below our point-by-point replies (blue font) to all comments (black font). Changes made to the manuscript are in orange font. Where modifications have been made to the original manuscript, the respective passage is highlighted in bold font. Line numbers associated with the modifications refer to the revised manuscript.*

RC1:

Einbock and Conen present a well-written manuscript on measurements of ice nucleating particles (INPs) in washing water of leaves from a number of trees and air samples collected in Switzerland. The study appears to be well-conceived and methodologically sound. The results provide valuable insights into INPs from plant surfaces and provide a solid basis for further research. It is a valuable contribution to the literature on potential sources of atmospheric INPs. Some issues still need to be addressed before publication.

Specific comments:

L15: Please clarify what is meant by "exposed leaves" with respect to the type of exposure.

We specified the sentence:

The cumulative concentration of INPs active at  $\geq -10$  °C (INP<sub>-10</sub>) did not vary significantly between the investigated tree species, but as inferred from leaf mass per area and leaf carbon isotopic ratios seemed to be lower on sun as compared with shade leaves. (L13-15)

L37-38: “..and living as well as decaying vegetation (Lindemann et al., 1982; Lindow et al., 1978a; Schnell and Vali, 1976) are major sources of biological INPs.” The statement needs to be modified and references added, because vegetation is defined as the plant cover in a given area. However, the references cited are for bacterial INPs. While these studies link bacteria to living or decaying vegetation, they don't directly address the vegetation itself as source of INP. Given that this study analyzed INPs from leaf washing water, the possible contribution of plants themselves as sources of biological INPs should be mentioned (e.g., Pummer et al., 2012, Hiranuma et al., 2015, Felgitsch et al., 2018., Seifried et al., 2020).

Thank you for pointing out this issue. We added the references Felgitsch et al. 2018, Haga et al. 2014, Hiranuma et al. 2015, Pummer et al. 2012 and Seifried et al. 2020 to the statement to account for the contribution of INPs associated with plant material itself to the overall biological INP population. Also, we split the references between living and decaying vegetation to make the allocation clearer:

Soil organic matter (Conen et al., 2011; Hill et al., 2016; O'Sullivan et al., 2014) and living **vegetation (Felgitsch et al., 2018; Hiranuma et al., 2015; Lindemann et al., 1982; Lindow et al., 1978; Pummer et al., 2012; Seifried et al., 2020)** as well as decaying vegetation (**Haga et al., 2014; Schnell and Vali, 1976**) are major sources of biological INPs. (L37-39)

L38-40: Please also consider the recent study by Wieland et al., 2024 that found birch INP to be active above -10°C.

Thank you for drawing our attention to this study. The revised manuscript now relates to it in several instances:

Recently, also INP<sub>-10</sub> originating from pollen have been identified (Gute and Abbatt, 2020; Kinney et al., 2024; Wieland et al., 2024). (L41-42)

Recently, such clustering was also discovered in cell-free INPs shed by **the ice-nucleation active (INA) fungus *Fusarium acuminatum*** (Schwidetzky et al., 2023) **and in ice nucleating macromolecules (INMs) released by pollen of *Betula pendula*** (Wieland et al., 2024). (L54-55)

Potential additional sources of INP<sub>-10</sub> at the sampling locations **known at present** might include **INMs** derived from pollen (Gute and Abbatt, 2020; Kinney et al. 2024; **Wieland et al., 2024**). (L187-189)

L112: While I would expect that any counting error would be detected when two independent observers count by eye, I wonder about a potential error when only one observer counts by eye. How often has it been counted?

Frozen tubes are usually counted once at each temperature step. Only if there has been a distraction, i.e., someone starting to talk to the counting observer, the tubes are counted twice. We found that counting errors occur to new observers still in the process of developing a routine in handling and properly illuminating the samples. Yet, the learning curve is steep and after a while errors become extremely rare. That is, independent experienced observers of the same assay almost always report identical numbers of frozen tubes. We have made this experience many times with new laboratory assistants, but have not systematically recorded or analysed these tests. Observations in this study were done by the authors, who both have several years of experience. Having two observers was more to increase the speed of analysis than to detect very rare eventual counting errors. We amended the manuscript accordingly:

After every 1 °C step in cooling (rate 0.3 °C min<sup>-1</sup>), temperature was left unchanged for at least 30 s before the number of frozen droplets was determined visually by one **observer on both subsets**, or two independent observers **on one subset each**. (L120-122)

L116: Leaves were initially collected in polyethylene zip bags and were transferred into 50 mL tubes after colour assessment. The authors should add information on the handling of the leaves for colour assessment. Were the leaves removed from the zip bags? Where were they placed? For how long? How were the leaves handled? Both, the material used and the handling of the leaves could have introduced INP contamination. Did the authors perform INP tests on the zip bag and tubes used, e.g., by washing them with MilliQ to exclude such contamination?

Thank you bringing this up. To test INP contamination of the zip bags and tubes, a blank was measured by filling 50 mL of ultrapure water (W4502-1L, Sigma-Aldrich) into a zip bag, shaking it so that the entire bag surface was wetted and filling it into a 50 mL tube as used for leaf analysis (Cellstar®, greiner bio-one, Switzerland). The subsequent INP analysis was performed as for the leaf samples. Tubes only froze several Degree Celsius below -10 °C:

Blank measurements had shown the zip bags did not contain INP<sub>-10</sub>. (L84-85)

We further complemented the revised manuscript with information on handling of the leaves during colour assessment:

For the colour assessment which took a few minutes per sample, leaves were removed from the polyethylene zip bags and spread adaxial side up on top of a new polyethylene zip bag cleaned with 2-Propanol. (L103-105)

Throughout the process, leaves were handled with gloves (Vasco® Nitril light, B. Braun, Switzerland) cleaned with 2-Propanol. (L107-108)

L126: Were all standards used in all calibrations? Can the authors add more details about the standards used, e.g., company, reference?

We are sorry for the imprecision and thank you for commenting on this. No, we did not use all standards in all calibrations. Specific Glycine (Arndt Schimmelmann Glycine No 4, <https://hcnisotopes.earth.indiana.edu/doc/alphabetical-list-of-all-reference-materials-ada.pdf>) and USGS62 (Coplen, 2019b) were used for additional analyses not presented in the final version of the manuscript.

We specified the section and added references to the used standards:

Mass calibration for C and N quantification was performed with the lab standard EDTA (41.09% C; 9.59% N). For isotopic (C) size **correction and calibration the lab standard EDTA (41.09% C; 9.59% N)**, USGS61 (Coplen, 2019b) and USGS40 (Coplen, 2019a) were used. (L135-137)

L135: “Usually” implies that some samples were collected differently. No number is given, but does this refer to “The remaining four samples” mentioned later? Consider rephrasing for more clarity.

Yes, the “usually” refers to the majority of 129 samples collected during 25 min of impinger operation compared to four samples collected during 15 min of impinger operation.

We reformulated the two sentences for more clarity:

**The majority of samples (n = 129)** were collected throughout 30-min periods consisting of 5 consecutive 5-min intervals. For the remaining samples (**n = 4**), the impinger was operated at three consecutive 5-min intervals. (L146-148)

L138: Was this also done after the last 5-min sampling interval? If yes, I suggest to write “..was replenished after each 5-min sampling interval”

No, water was not replenished after the last 5-min sampling interval. Instead, the volume of the remaining liquid in the sampling cone was quantified.

We expanded the description in the manuscript:

After the last 5-min interval, liquid volume in the sampling cone was quantified. (L149-150)

L162: The authors found a correlation between INP concentration and relative humidity (RH). Given that RH and rainfall are related, I wonder about the potential influence of rainfall events on this observed correlation. For example, Bigg et al. (2015) have reported a persistent effect of rainfall on INP concentrations. It would be interesting to explore this relationship for this dataset by plotting INP concentration against rainfall frequency, if such data are available.

We agree and had also expected to potentially find a correlation between rain events and INP concentrations. However, precipitation measurements at Gempen obtained from the data portal of the Swiss Federal Office of Meteorology and Climatology (MeteoSwiss) showed no correlation between total precipitation (mm) and INP concentrations for different time spans (within 24 h, 48 h, 7 days and 14 days prior to sampling, measurement intervals ending at 0600 UTC on the sampling day):

| date       | median INP <sub>-10</sub><br>concentration | Sum of precipitation (mm) in preceding time interval |      |      |       |
|------------|--------------------------------------------|------------------------------------------------------|------|------|-------|
|            |                                            | 24 h                                                 | 48 h | 7 d  | 14 d  |
| 09.08.2023 | 3.8                                        | 0                                                    | 2.7  | 16.2 | 28.0  |
| 22.08.2023 | 7.0                                        | 0                                                    | 0    | 0    | 15.8  |
| 12.09.2023 | 9.5                                        | 0                                                    | 0    | 0    | 8.2   |
| 26.09.2023 | 16.1                                       | 0                                                    | 0    | 10.3 | 64.0  |
| 03.10.2023 | 28.6                                       | 0                                                    | 0    | 0    | 10.3  |
| 17.10.2023 | 20.6                                       | 0                                                    | 0    | 7.0  | 7.0   |
| 30.10.2023 | 46.8                                       | 0                                                    | 0    | 48.8 | 64.6  |
| 15.11.2023 | 38.0                                       | 17.3                                                 | 30.0 | 62.1 | 128.6 |

Since rainfall can impact biological INPs and also in response to a comment by Referee #2 on the same topic, we expanded the manuscript:

There was no precipitation 24 h prior to sampling during the entire campaign at both sites, except for the last sampling day in November (17.3 mm over 24 h). (L176-177)

L172-174: The statement regarding the contribution of pollen to INP concentrations should be explained. The authors do not present data to support the absence of pollen, pollen fragments, or pollen-derived INP in their samples. While the four tree species studied do not appear to pollinate during the seasons studied, other tree species, flowers, and shrubs - including some for which IN activity may not be known - may do so. Pollen could also come from long-distance transport from other locations.

We understand that the potential contribution of pollen to the INP population should be discussed further in the manuscript. We now do this based on continuous measurements of atmospheric pollen concentrations from the nearest monitoring station operated by MeteoSwiss about 10 km NW of Gempen:

Tree species commonly found in central European forests, including the four species investigated here, typically do not flower between August and November (Anonymos, 2002). Still, wind-dispersed pollen from other plant species and long-range transport deposited onto the leaves might have contributed to the analysed INP population. Atmospheric pollen concentrations at Basel are continuously monitored and measurements for about 50 plant species or families are available until 29.09.2023, seven among them until the end of the sampling period. While cumulative INP<sub>-10</sub> concentrations on leaves increased, airborne pollen concentrations showed a decreasing trend. There was no correlation between pollen concentrations from individual species or families and INP<sub>-10</sub> concentrations. In the following, we will therefore focus on microbial INPs. (L189-196)

L184/185: Consider including results on temperature exposure of different tree species in the main text or supplementary section of the manuscript.

Unfortunately, there is no data available on the leaf temperature of the sampled trees.

L185/186: Clarify what "different exposure of the trees" refers to. Exposure to what?

We reformulated the paragraph for clarification:

The significant correlation between air temperature and INP<sub>-10</sub> concentration in *P. avium* and the absence of such a correlation in the other species might have been related to **the free-standing position of *P. avium* in a meadow while the other trees investigated were situated within a forest**. Thus, the *P. avium* were less shielded by surrounding trees against radiative cooling during clear nights and might have experienced lower leaf temperatures, pronouncing the effect of temperature on the observed INP<sub>-10</sub> concentrations. Jordan and Smith (1994) found leaf temperatures during clear nights were around 4°C below air temperature. (L206-211)

L211: Clarify what the asterisk and the slash mean in this context

In this context, the asterisk and slash refer to the mathematical operations of multiplication and division. Analogous to the description of normally distributed data with arithmetic mean and additive standard deviation (arithmetic mean  $\pm$  additive standard deviation), the use of the geometric mean and multiplicative standard deviation has been proposed for the description of log-normally distributed data (geometric mean  $\times$  multiplicative standard deviation). It means that 68% of the values in a distribution are between the geometric mean divided by the multiplicative standard deviation and the geometric mean multiplied by the geometric standard deviation (Limpert et al., 2001).

We should have used an  $\times$  as symbol for multiplication instead of the \* for more clarity and also better explain the underexploited multiplicative standard deviation:

In the vertically sampled *F. sylvatica* (HOL), INP<sub>-10</sub> concentrations increased from the top to the lowest part of the canopy. The four samples from the top had a median value of 4.0 INP<sub>-10</sub> cm<sup>-2</sup> with a multiplicative standard deviation of  $\times$  1.5 (i.e., 68% of leaf samples at the top of the tree had an INP<sub>-10</sub> concentration between 2.7 (4.0 / 1.5) and 6.0 (4.0  $\times$  1.5) INP<sub>-10</sub> cm<sup>-2</sup>). (L234-236)

L215: Please clarify what "this position" refers to

We rephrased the sentence to clarify that "this position" refers to the sample collected from the bottom part of the canopy facing a SE direction:

Five weeks later, INP concentrations at **the lowest position facing a SE direction** had decreased **distinctly from 73.1 INP<sub>-10</sub> cm<sup>-2</sup> to 15.8 INP<sub>-10</sub> cm<sup>-2</sup>** but were still twice as high as at the opposite canopy side. (L239-240)

L253: For completeness, it may be helpful to provide a brief explanation of what Type II INPs are. Also, the reference provided supports this classification for bacterial INPs, but not for biological INPs, which include fungal or plant INPs.

We added an explanation for Type II INPs and changed “biological” to “bacterial” INPs to match the cited reference.

According to their efficiency, **bacterial** INPs are categorised as either type I, II or III, corresponding to a decrease in nucleation temperature. (L276-277)

Type II INPs are typically less abundant and induce freezing between -5 °C and -7 °C (Yankofsky et al., 1981). (L277-278)

L258: Please add specification of what "leaf habitat properties" might involve (e.g., microclimate, leaf morphology, etc.).

Done:

These differences indicate that variations in leaf habitat properties **such as microclimate, leaf morphology and physiology, and cooccurring differences in the phyllosphere microbiome** between tree species might have contributed variation to the distribution of spectral types among species. (L282-285)

L275: It may be useful to clarify that "radiation" refers to solar radiation or UV exposure to avoid ambiguity.

We complemented the sentence accordingly:

For example, **UV and  $\gamma$ -radiation** (de Araujo et al., 2019; Govindarajan and Lindow, 1988), desiccation (de Araujo et al., 2019), decreasing pH (Lukas et al., 2022) and high temperatures around 30 °C (Nemecek-Marshall et al., 1993) seem to trigger the dissolution of IN protein complexes, whereas lower temperatures around 15 °C and nutrient limitation can promote their formation (Nemecek-Marshall et al., 1993; Ruggles et al., 1993). (L301-305)

L280: The statement “The more efficient an INP, the more sensitive it is to stress (Govindarajan and Lindow, 1988).” does not seem to apply universally to all types of INPs and stresses (e.g., Kunert et al., 2019, Eufemio et al., 2023).

This is correct, we have to be more precise here:

**The larger an IN protein cluster and the higher the resultant nucleation temperature of the proteinaceous INP, the faster its activation temperature is lowered by certain stressors, e.g. radiation** (Govindarajan and Lindow, 1988). (L306-307)

L283/284: This is rather speculative. *Fagus sylvatica* could simply harbor different INPs, such as those associated with specific plant pathogens. Certain plant pathogens can contribute to the diversity of biological INPs (e.g., Morris et al., 2008, 2013, Kunert et al., 2019).

Plant pathogens are typically host-specific, meaning that they are adapted to infect particular plant species. While they can occasionally be found on non-host plants due to factors like accidental contamination or environmental conditions, they do not cause disease or reproduce effectively on these plants. This host specificity suggests that different plant species might host distinct INP-producing microorganisms or pathogens that are not present or are less prevalent on other species.

Thank you for the instructive comment. We agree that the described mechanism is only one among several conceivable explanations for the development of the monotonous spectral type which we emphasize in the revised manuscript:

The gradual breakup of larger IN protein clusters under continued stress in unfavorable conditions, or the inhibition of INP cluster formation could be **one** possible explanation for the development of the monotonous spectral type. This **explanation would imply** that conditions for the expression and aggregation of IN proteins were less suitable on *F. sylvatica* as compared to the other investigated tree species. **Another explanation could be host-specific properties of *F. sylvatica* resulting in a limited set of INP-producing microorganisms that generate the monotonous spectral type only.** (L308-313)

L286/287: Please provide an explanation or context for how these factors influence INP behaviour?

The availability of water and nutrients critically influences the survival and growth of microbial populations in the phyllosphere (Vorholt, 2012). The mentioned factors (cuticle characteristics, leaf wettability, leaf exudates and leaf topography) can impact the availability of water or nutrients on leaf surfaces as well as differ between tree species. Thus, the mentioned factors could potentially influence the population size or composition of epiphytic (INA) microorganisms or, if the availability of nutrients is being affected, their nucleation frequency (Nemecek-Marshall et al., 1993; Ruggles et al., 1993).

We added the following explanation in this context:

Yet, other differences in microhabitat, for example due to variations in cuticle characteristics, leaf wettability, leaf exudates or leaf topography (Yan et al., 2022), might have contributed to the unequal distribution of spectral patterns between tree species. **These factors can impact the availability of water or nutrients on leaf surfaces, thereby affecting population size and perhaps also composition of epiphytic (INA) microorganisms. In addition, there is a link between nutrient availability and the frequency at which ice-nucleating activity is expressed in certain INA-species (Nemecek-Marshall et al., 1993; Ruggles et al., 1993).** (L314-319)

Figure 3: Clarify what is meant by “dark backgrounds” when all backgrounds are in light-colors.

In Figure 3, we distinguish seven different panel background colours: white as well as a lighter and a darker version each for orange, blue and grey. However, since all colours are rather light and visual differentiation between them could be challenging, we decided to revise Figure 3 by assigning more vibrant colours as panel backgrounds.

Also, we specified the caption of Figure 3:

Colours reflect leaf colours, panel background **colour** indicates the spectral type (white: monotonous spectral type, **brown**: peak at -8.5 °C, **green**: peak at -7.5 °C, **purple**: peak > -7.5 °C). **Dark brown, dark green and dark purple** panel backgrounds are for spectra with significant peaks, **light brown, light green and light purple** panel backgrounds are for spectra with insignificant peaks (section 2.3). (L291-293)

L334-336: Please specify what dynamics refers to (e.g., distribution, activity, concentration).

We modified the last two sentences of our conclusion and specified what dynamics refer to:

Therefore, at locations in the atmosphere where mixed-phase clouds can form and INPs originating from the phyllosphere comprise a large part of the biological INP population, changes in meteorological conditions **beyond** rainfall (Mignani et al., 2021) **could** impact **the INP source and, thereby,** cloud development. Further exploration and quantification of the effect of meteorological parameters on biological INP populations **on leaves** might reveal interesting insights into the dynamics **of the INP distribution** at mixed-phase cloud height. (L368-373)

Technical corrections/typos:

L36: remove the period after “thereof”

Done.

L76: Form-> From

Corrected.

L85: remove space before “100”

Done.

L91: NSC->NCS

Corrected.

L113/115: I assume the authors mean “dilutions” instead of “dilution series” in both instances

Yes, thank you for spotting this.

L114: were -> where

Corrected.

L118: concentration -> concentrations

Corrected.



L123: was -> were

Corrected.

L127: analyszed -> analysed

Corrected.

L131: Consider rephrasing to “ JFJ is at a 3 km higher elevation than the foilage sampling sites”

We rephrased the sentence:

The observatory JFJ is located at a 3 km higher elevation **than the foliage sampling sites and situated about 110 km SSE of Gempen.** (L142-143)

L159/160: I think it should read “per cm<sup>2</sup>” of leaf area

Changed accordingly.

L236: Consider rephrasing the last part of the sentence to “ leaves that are more exposed to sunlight in the canopy”

We rephrased the statement and now mention that leaves exposed to more sunlight in a canopy might be more exposed to a number of different stressors potentially removing INPs more efficiently than from leaves in other parts of the canopy in an additional sentence:

Our results from Hölstein indicate that INP<sub>-10</sub> concentrations are lower on **leaves more exposed to sunlight in a canopy. Such leaves at the upper and outer part of a canopy might be in general more exposed to stressors or processes potentially removing INPs from leaves compared to leaves in other parts of the canopy.** (L257-260)

L247: „warmer“ instead of „colder“ temperatures; the values given afterwards are higher than the values given in the sentence before

Thank you for noticing this.

L332: from -> form

Corrected.

Table S1/S2 captions: Add a definition for LMA

Done.

Table S2 caption: leaf -> Leaf

Corrected.

## References:

Bigg, E. K., Soubeyrand, S., and Morris, C. E.: Persistent after-effects of heavy rain on concentrations of ice nuclei and rainfall suggest a biological cause, *Atmos. Chem. Phys.*, 15, 2313–2326, <https://doi.org/10.5194/acp-15-2313-2015>, 2015.

Eufemio, R. J., de Almeida Ribeiro, I., Sformo, T. L., Laursen, G. A., Molinero, V., Fröhlich-Nowoisky, J., Bonn, M., and Meister, K.: Lichen species across Alaska produce highly active and stable ice nucleators, *Biogeosciences*, 20, 2805–2812, <https://doi.org/10.5194/bg-20-2805-2023>, 2023.

Felgitsch, L., Baloh, P., Burkart, J., Mayr, M., Momken, M. E., Seifried, T. M., Winkler, P., Schmale III, D. G., and Grothe, H.: Birch leaves and branches as a source of ice-nucleating macromolecules, *Atmos. Chem. Phys.*, 18, 16063–16079, <https://doi.org/10.5194/acp-18-16063-2018>, 2018.

Hiranuma, N., Möhler, O., Yamashita, K., Tajiri, T., Saito, A., Kiselev, A., Hoffmann, N., Hoose, C., Jantsch, E., Koop, T., and Murakami, M.: Ice nucleation by cellulose and its potential contribution to ice formation in clouds, *Nat. Geosci.*, 8, 273–277, <https://doi.org/10.1038/ngeo2374>, 2015.

Kunert, A. T., Pöhlker, M. L., Tang, K., Krevert, C. S., Wieder, C., Speth, K. R., Hanson, L. E., Morris, C. E., Schmale III, D. G., Pöschl, U., and Fröhlich-Nowoisky, J.: Macromolecular fungal ice nuclei in *Fusarium*: effects of physical and chemical processing, *Biogeosciences*, 16, 4647–4659, <https://doi.org/10.5194/bg-16-4647-2019>, 2019.

Morris CE, Sands DC, Vinatzer BA, Glaux C, Guilbaud C, Buffière A, Yan S, Dominguez H, Thompson BM. The life history of the plant pathogen *Pseudomonas syringae* is linked to the water cycle. *ISME J.* 2008 Mar;2(3):321-34. doi: 10.1038/ismej.2007.113. Epub 2008 Jan 10. PMID: 18185595.

Morris, C. E., Sands, D. C., Glaux, C., Samsatly, J., Asaad, S., Moukahel, A. R., Gonçalves, F. L. T., and Bigg, E. K.: Urediospores of rust fungi are ice nucleation active at  $> -10$  °C and harbor ice nucleation active bacteria, *Atmos. Chem. Phys.*, 13, 4223–4233, <https://doi.org/10.5194/acp-13-4223-2013>, 2013.

Pummer, B. G., Bauer, H., Bernardi, J., Bleicher, S., and Grothe, H.: Suspendable macromolecules are responsible for ice nucleation activity of birch and conifer pollen, *Atmos. Chem. Phys.*, 12, 2541–2550, <https://doi.org/10.5194/acp-12-2541-2012>, 2012.

Seifried, T. M., Bieber, P., Felgitsch, L., Vlasich, J., Reyzek, F., Schmale III, D. G., and Grothe, H.: Surfaces of silver birch (*Betula pendula*) are sources of biological ice nuclei: in vivo and in situ investigations, *Biogeosciences*, 17, 5655–5667, <https://doi.org/10.5194/bg-17-5655-2020>, 2020.

Wieland, F., Bothen, N., Schwidetzky, R., Seifried, T. M., Bieber, P., Pöschl, U., Meister, K., Bonn, M., Fröhlich-Nowoisky, J., and Grothe, H.: Aggregation of ice-nucleating macromolecules from *Betula pendula* pollen determines ice nucleation efficiency, *EGUsphere* [preprint], <https://doi.org/10.5194/egusphere-2024-752>, 2024.

## References

Anonymos: *Mitteleuropäische Waldbaumarten - Artbeschreibung und ökologie unter besonderer Berücksichtigung der Schweiz*, ETH Zürich, <https://ethz.ch/content/dam/ethz/special-interest/usys/ites/waldmgmt-waldbau-dam/documents/Lehrmaterialien/Skripte/Baumartenbeschreibungen/ME-Waldbaumarten>, 2002.

de Araujo, G. G., Rodrigues, F., Gonçalves, F. L. T., and Galante, D.: Survival and ice nucleation activity of *Pseudomonas syringae* strains exposed to simulated high-altitude atmospheric conditions, *Sci. Rep.*, 9, 7768, <https://doi.org/10.1038/s41598-019-44283-3>, 2019.

Conen, F., Morris, C. E., Leifeld, J., Yakutin, M. V., and Alewell, C.: Biological residues define the ice nucleation properties of soil dust, *Atmos. Chem. Phys.*, 11, 9643–9648, <https://doi.org/10.5194/acp-11-9643-2011>, 2011.

Coplen, T. B.: RSIL: Report of Stable Isotopic Composition for reference material USGS40 | U.S. Geological Survey, <https://www.usgs.gov/media/files/rsil-report-stable-isotopic-composition-reference-material-usgs40>, 2019a.

Coplen, T. B.: RSIL: Report of Stable Isotopic Composition for reference materials USGS61 USGS62 and USGS63 | U.S. Geological Survey, <https://www.usgs.gov/media/files/rsil-report-stable-isotopic-composition-reference-materials-usgs61-usgs62-and-usgs63>, 2019b.

Felgitsch, L., Baloh, P., Burkart, J., Mayr, M., Momken, M. E., Seifried, T. M., Winkler, P., Schmale III, D. G., and Grothe, H.: Birch leaves and branches as a source of ice-nucleating macromolecules, *Atmos. Chem. Phys.*, 18, 16063–16079, <https://doi.org/10.5194/acp-18-16063-2018>, 2018.

Govindarajan, A. G. and Lindow, S. E.: Size of bacterial ice-nucleation sites measured in situ by radiation inactivation analysis, *Proc. Natl. Acad. Sci. U. S. A.*, 85, 1334–1338, <https://doi.org/10.1073/pnas.85.5.1334>, 1988.

Gute, E. and Abbatt, J. P. D.: Ice nucleating behavior of different tree pollen in the immersion mode, *Atmos. Environ.*, 231, 117488, <https://doi.org/10.1016/j.atmosenv.2020.117488>, 2020.

Haga, D. I., Burrows, S. M., Iannone, R., Wheeler, M. J., Mason, R. H., Chen, J., Polishchuk, E. A., Pöschl, U., and Bertram, A. K.: Ice nucleation by fungal spores from the classes *Agaricomycetes*, *Ustilaginomycetes*, and *Eurotiomycetes*, and the effect on the atmospheric transport of these spores, *Atmos. Chem. Phys.*, 14, 8611–8630, <https://doi.org/10.5194/acp-14-8611-2014>, 2014.

Hill, T. C. J., DeMott, P. J., Tobo, Y., Fröhlich-Nowoisky, J., Moffett, B. F., Franc, G. D., and Kreidenweis, S. M.: Sources of organic ice nucleating particles in soils, *Atmos. Chem. Phys.*, 16, 7195–7211, <https://doi.org/10.5194/acp-16-7195-2016>, 2016.

Hiranuma, N., Möhler, O., Yamashita, K., Tajiri, T., Saito, A., Kiselev, A., Hoffmann, N., Hoose, C., Jantsch, E., Koop, T., and Murakami, M.: Ice nucleation by cellulose and its potential contribution to ice formation in clouds, *Nature Geosci.*, 8, 273–277, <https://doi.org/10.1038/ngeo2374>, 2015.

Jordan, D. N. and Smith, W. K.: Energy balance analysis of nighttime temperatures and forest formation in a subalpine environment, *Agric. For. Meteorol.*, 71, 359–372, 1994.

Kinney, N. L. H., Hepburn, C. A., Gibson, M. I., Ballesteros, D., and Whale, T. F.: High interspecific variability in ice nucleation activity suggests pollen ice nucleators are incidental, *Biogeosciences*, 21, 3201–3214, <https://doi.org/10.5194/bg-21-3201-2024>, 2024.

Limpert, E., Stahel, W. A., and Abbt, M.: Log-normal Distributions across the Sciences: Keys and Clues, *BioScience*, 51, 341–352, [https://doi.org/10.1641/0006-3568\(2001\)051\[0341:LNDATS\]2.0.CO;2](https://doi.org/10.1641/0006-3568(2001)051[0341:LNDATS]2.0.CO;2), 2001.

Lindemann, J., Constantinidou, H. A., Barchet, W. R., and Upper, C. D.: Plants as Sources of Airborne Bacteria, Including Ice Nucleation-Active Bacteria, *Appl. Environ. Microbiol.*, 44, 1059–1063, 1982.

Lindow, S. E., Arny, D. C., and Upper, C. D.: Distribution of ice nucleation-active bacteria on plants in nature., *Appl. Environ. Microbiol.*, 36, 831–838, 1978.

Lukas, M., Schwidetzky, R., Eufemio, R. J., Bonn, M., and Meister, K.: Toward Understanding Bacterial Ice Nucleation, *J. Phys. Chem. B*, 126, 1861–1867, <https://doi.org/10.1021/acs.jpcc.1c09342>, 2022.

Nemecek-Marshall, M., LaDuca, R., and Fall, R.: High-level expression of ice nuclei in a *Pseudomonas syringae* strain is induced by nutrient limitation and low temperature, *J. Bacteriol.*, 175, 4062–4070, <https://doi.org/10.1128/jb.175.13.4062-4070.1993>, 1993.

O’Sullivan, D., Murray, B. J., Malkin, T. L., Whale, T. F., Umo, N. S., Atkinson, J. D., Price, H. C., Baustian, K. J., Browse, J., and Webb, M. E.: Ice nucleation by fertile soil dusts: relative importance of mineral and biogenic components, *Atmos. Chem. Phys.*, 14, 1853–1867, <https://doi.org/10.5194/acp-14-1853-2014>, 2014.

Pummer, B. G., Bauer, H., Bernardi, J., Bleicher, S., and Grothe, H.: Suspendable macromolecules are responsible for ice nucleation activity of birch and conifer pollen, *Atmos. Chem. Phys.*, 12, 2541–2550, <https://doi.org/10.5194/acp-12-2541-2012>, 2012.

Ruggles, J. A., Nemecek-Marshall, M., and Fall, R.: Kinetics of appearance and disappearance of classes of bacterial ice nuclei support an aggregation model for ice nucleus assembly., *J. Bacteriol.*, 175, 7216–7221, 1993.

Schnell, R. C. and Vali, G.: Biogenic Ice Nuclei: Part I. Terrestrial and Marine Sources, *J. Atmos. Sci.*, 33, 1554–1564, [https://doi.org/10.1175/1520-0469\(1976\)033<1554:BINPIT>2.0.CO;2](https://doi.org/10.1175/1520-0469(1976)033<1554:BINPIT>2.0.CO;2), 1976.

Seifried, T. M., Bieber, P., Felgitsch, L., Vlasich, J., Reyzek, F., Schmale III, D. G., and Grothe, H.: Surfaces of silver birch (*Betula pendula*) are sources of biological ice nuclei: in vivo and in situ investigations, *Biogeosciences*, 17, 5655–5667, <https://doi.org/10.5194/bg-17-5655-2020>, 2020.

Vorholt, J. A.: Microbial life in the phyllosphere, *Nat. Rev. Microbiol.*, 10, 828–840, <https://doi.org/10.1038/nrmicro2910>, 2012.

Wieland, F., Bothen, N., Schwidetzky, R., Seifried, T. M., Bieber, P., Pöschl, U., Meister, K., Bonn, M., Fröhlich-Nowoisky, J., and Grothe, H.: Aggregation of ice-nucleating macromolecules from *Betula pendula* pollen determines ice nucleation efficiency, *EGUsphere*, 1–19, <https://doi.org/10.5194/egusphere-2024-752>, 2024.

Yankofsky, S. A., Levin, Z., Bertold, T., and Sandlerman, N.: Some Basic Characteristics of Bacterial Freezing Nuclei, *J. Appl. Meteor. Climatol.*, 20, 1013–1019, [https://doi.org/10.1175/1520-0450\(1981\)020<1013:SBCOBF>2.0.CO;2](https://doi.org/10.1175/1520-0450(1981)020<1013:SBCOBF>2.0.CO;2), 1981.
